# Supplementary material for: ‘Auto-click’ functionalization for diversified copper(i) and gold(i) NHCs
Source: Royal Society of Chemistry journal article supplement (doi:10.1039/c4dt00429a), 2014-01-01
Supplement: c4dt00429a1.pdf [file c4dt00429a1.pdf]

## 'Auto-Click' Functionalization for Diversified Copper(I) and Gold(I) NHCs

Houssein Ibrahim,<sup>a</sup> Clémentine Gibard,<sup>a</sup> Cédric Hesling,<sup>b</sup> Régis Guillot,<sup>b</sup> Laurent Morel,<sup>b,d,e</sup> Arnaud Gautier,<sup>a,f</sup> and Federico Cisnetti<sup>a</sup>

<sup>a</sup> Clermont Université, Université Blaise Pascal, Institut de Chimie de Clermont-Ferrand, BP 10448, F-63000 Clermont-Ferrand, FRANCE.

<sup>b</sup> Clermont Université, Université Blaise Pascal, GReD, BP 10448, F-63000 Clermont-Ferrand, FRANCE

<sup>c</sup> Institut de Chimie Moléculaire et des Matériaux d'Orsay, Bât. 420, Université Paris-Sud, UMR CNRS 8182, F-91405 ORSAY Cedex, France.

<sup>d</sup> CNRS, UMR 6293, GReD, F-63001 Clermont-Ferrand, FRANCE.

<sup>e</sup> Inserm, UMR 1103, GReD, F-63001 Clermont-Ferrand, FRANCE.

<sup>f</sup> CNRS, UMR 6296, ICCF, F-63171 AUBIERE, FRANCE

### Supporting information

#### NMR survey of a 'auto-click' reaction

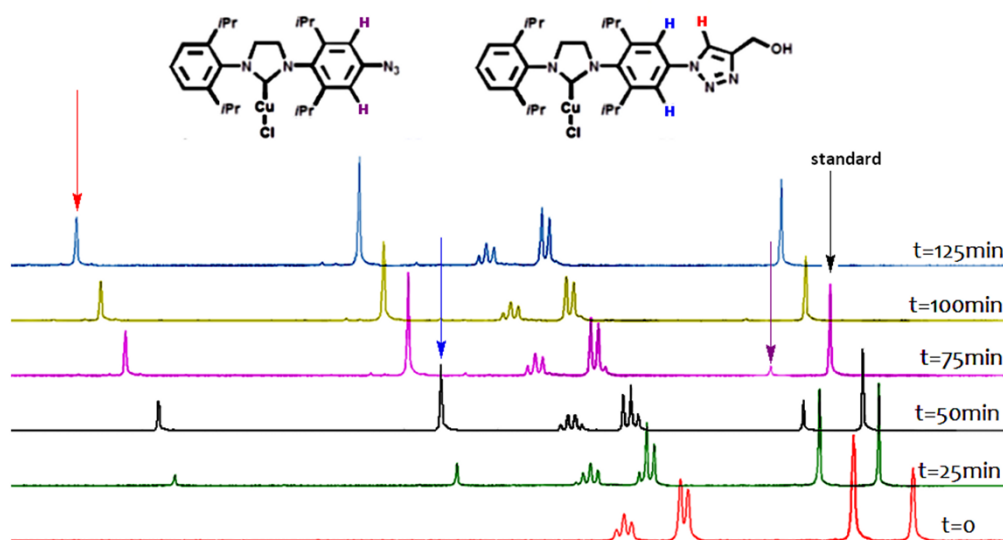

**Figure S1.** <sup>1</sup>H NMR (CD<sub>3</sub>CN, 70°C) profile of the reaction vs time (1,4–dimethoxybenzene as internal standard).

#### X-ray cristallography

X-ray diffraction data was collected by using a Kappa X8 APPEX II Bruker diffractometer with graphite-monochromated MoK $\alpha$  radiation ( $\lambda = 0.71073$  Å). The crystal was mounted on a CryoLoop (Hampton Research) with Paratone-N (Hampton Research) as cryoprotectant and then flashfrozen in a nitrogen gas stream at 100 K. The temperature of the crystal was maintained at the selected value (100 K) by a 700 series Cryostream cooling device with an accuracy of  $\pm 1$  K. The data were corrected for Lorentz polarization, and absorption effects. The structures were solved by direct methods using SHELXS-97<sup>i</sup> and refined against F<sup>2</sup> by full-matrix least-squares techniques using SHELXL-97<sup>ii</sup> with anisotropic displacement parameters for all non-hydrogen atoms. Hydrogen atoms were located on a difference Fourier map and introduced into the calculations as a riding model with isotropic thermal parameters. All calculations were performed by using WINGX.<sup>iii</sup> The crystal data collection and

refinement parameters are given in Table S1. CCDC 977560 contains the supplementary crystallographic data for this paper. These data can be obtained free of charge from the Cambridge Crystallographic Data Centre via <http://www.ccdc.cam.ac.uk/Community/Requestastructure>.

**Table S1.** Crystallographic data and structure refinement details for compound **7c**.

| Compound                                                       | <b>7c</b>                                                                                                  |
|----------------------------------------------------------------|------------------------------------------------------------------------------------------------------------|
| Empirical Formula                                              | C <sub>38</sub> H <sub>43</sub> Cl Cu N <sub>5</sub> O <sub>2</sub> , 2(C <sub>2</sub> H <sub>6</sub> O S) |
| <i>M<sub>r</sub></i>                                           | 857.05                                                                                                     |
| Crystal size, mm <sup>3</sup>                                  | 0.18 x 0.10 x 0.04                                                                                         |
| Crystal system                                                 | triclinic                                                                                                  |
| Space group                                                    | <i>P</i> -1                                                                                                |
| <i>a</i> , Å                                                   | 10.6132(3)                                                                                                 |
| <i>b</i> , Å                                                   | 17.8260(5)                                                                                                 |
| <i>c</i> , Å                                                   | 23.1406(6)                                                                                                 |
| $\alpha$ , °                                                   | 92.0760(10)                                                                                                |
| $\beta$ , °                                                    | 94.6390(10)                                                                                                |
| $\gamma$ , °                                                   | 90.1870(10)                                                                                                |
| Cell volume, Å <sup>3</sup>                                    | 4360.7(2)                                                                                                  |
| <i>Z</i> ; <i>Z'</i>                                           | 4 ; 2                                                                                                      |
| <i>T</i> , K                                                   | 100(1)                                                                                                     |
| <i>F</i> <sub>000</sub>                                        | 1808                                                                                                       |
| $\mu$ , mm <sup>-1</sup>                                       | 0.703                                                                                                      |
| $\theta$ range, °                                              | 0.88 – 30.61                                                                                               |
| Reflection collected                                           | 82 883                                                                                                     |
| Reflections unique                                             | 25 773                                                                                                     |
| <i>R</i> <sub>int</sub>                                        | 0.0421                                                                                                     |
| GOF                                                            | 1.026                                                                                                      |
| Refl. obs. ( <i>I</i> > 2 $\sigma$ ( <i>I</i> ))               | 18 361                                                                                                     |
| Parameters                                                     | 1022                                                                                                       |
| w <i>R</i> <sub>2</sub> (all data)                             | 0.1334                                                                                                     |
| <i>R</i> value ( <i>I</i> > 2 $\sigma$ ( <i>I</i> ))           | 0.0509                                                                                                     |
| Largest diff. peak and hole (e <sup>-</sup> ·Å <sup>-3</sup> ) | -1.446 ; 2.410                                                                                             |

<sup>i</sup> G. M. Sheldrick, SHELXS-97, Program for Crystal Structure Solution, University of Göttingen, Göttingen, Germany, **1997**.

<sup>ii</sup> G. M. Sheldrick, SHELXL-97, Program for the refinement of crystal structures from diffraction data, University of Göttingen, Göttingen, Germany, **1997**.

<sup>iii</sup> L. J. Farrugia, L. J. *J. Appl. Cryst.*, **1999**, 32, 837.
